# Supplementary material for: Social network analysis of obsidian artefacts and Māori interaction in northern Aotearoa New Zealand
Source: PLoS One. 2019 Mar 14;14(3):e0212941. doi: 10.1371/journal.pone.0212941 (PMC6417682; doi:10.1371/journal.pone.0212941)
Supplement: S3 Table — (CSV) [file pone.0212941.s004.csv]

Archaeological Site	Self Similarity
Bream Head	97.89
Helena Bay	100
Lake Owhareiti	99.61
Maungataketake	99.92
Mt. Wellington	99.72
Oneroa	N/A
Pig Bay	N/A
Ponui Island	N/A
Poueura	99.9
Sunde Site	N/A
Tamawera	N/A
Taputiketike Pa	N/A
Torpedo Bay	N/A
Urupukapuka Island	N/A
Waitapu Stream	N/A
